# Supplementary material for: Standardized pathology report for breast cancer
Source: PubMed Central journal article supplement — J Pathol Transl Med. 2021 Jan 11;55(1):1–15. doi: 10.4132/jptm.2020.11.20 (PMC7829577; doi:10.4132/jptm.2020.11.20), 2021-01-11
Supplement: jptm-2020-11-20-suppl1.pdf [file jptm-2020-11-20-suppl1.pdf]

**Supplementary Table S1.** Standard data element including all recommended issues

---

**Breast specimen type**

- Wide excision (specify)
- Total mastectomy (specify)

**Specimen laterality**

- Right
- Left
- Unspecified

**Tumor location**

- UOQ
- LOQ
- UIQ
- LIQ
- Central
- Unspecified

**Histologic type**

- Invasive breast carcinoma of no special type (specify for special morphological patterns)
- Invasive lobular carcinoma (specify for subtype)
- Tubular carcinoma
- Cribriform carcinoma
- Mucinous carcinoma
- Invasive micropapillary carcinoma
- Carcinoma with apocrine differentiation
- Metaplastic carcinoma (specify for subtype)
- Other rare subtype (specify)

**Tumor focality**

- Unifocal
- Multifocal (× )

**Tumor size**

\_\_ × \_\_ × \_\_ cm (For multiple tumors, describe all tumor sizes)

**Histologic grade**

- Grade I (Low)
- Grade II (Intermediate)
- Grade III (High)

Tubule formation: score

Nuclear pleomorphism: score

Mitotic count: score ( /10HPF or /mm<sup>2</sup>)

**Ductal carcinoma in situ (DCIS)**

- Not identified
  - Present ( EIC-positive,  EIC-negative)
-

---

*Nuclear grade*

- Grade I (Low)
- Grade II (Intermediate)
- Grade III (High)

*Necrosis*

- Not identified
- Present ( focal,  central)

*Architectural pattern*

- Comedo  Solid  Cribriform
- Micropapillary  Papillary
- Paget disease (DCIS involving nipple epidermis)
- Other (specify):

*Extent of DCIS (for EIC-positive case)*

Estimated size:            ×            cm

No. of blocks with DCIS/No. of blocks examined:            /

**Lobular carcinoma in situ (LCIS) (in case of invasive lobular carcinoma)**

- Not identified
- Present ( classic type,  pleomorphic type)

**Tumor extension**

*Skin*

- Not present
- Present ( uninvolved,  involved, without skin ulceration/with skin ulceration/with satellite skin nodule)

*Skeletal muscle*

- Not present
- Present ( uninvolved,  involved in pectoralis muscle,  involved in pectoralis muscle and chest wall)

**Resection margin**

- Cannot be assessed
- Positive for carcinoma

Location (specify): invasive carcinoma/DCIS/invasive carcinoma and DCIS (unifocal, multifocal, extensive)/pleomorphic LCIS

- Uninvolved by invasive carcinoma and/or DCIS

Distance from closest margin : \_\_\_ mm from \_\_\_\_\_ margin

Distance from other margins

Anterior: \_\_\_ mm  
Posterior: \_\_\_ mm  
Superior: \_\_\_ mm  
Inferior: \_\_\_ mm  
Medial: \_\_\_ mm

---

---

Lateral: \_\_\_ mm

**Regional lymph node metastasis**

Total number of lymph nodes examined:

Number of lymph nodes involved with metastases:

(sentinel node:        /        , non-sentinel node:        /        )

Number of lymph nodes involved with macrometastases (>2 mm):

Number of lymph nodes involved with micrometastases (>0.2 mm to 2 mm and/or >200 cells):

Size of largest metastasis:        mm

Extranodal extension: Not identified/Present

**Lymphovascular invasion**

Not identified

Present ( focal,  extensive)

**Pathologic stage classification (pTNM, AJCC 8th Edition)**

TNM descriptors:  m  r  y

Primary tumor (pT):

Regional lymph nodes (pN):

---

UOQ, upper outer quadrant; LOQ, lower outer quadrant; UIQ, upper inner quadrant; LIQ, lower inner quadrant; HPF, high-power field; EIC, extensive intraductal component; AJCC, American Joint Committee on Cancer.
