# Supplementary material for: Standardized pathology report for breast cancer
Source: PubMed Central journal article supplement — J Pathol Transl Med. 2021 Jan 11;55(1):1–15. doi: 10.4132/jptm.2020.11.20 (PMC7829577; doi:10.4132/jptm.2020.11.20), 2021-01-11
Supplement: jptm-2020-11-20-suppl3.pdf [file jptm-2020-11-20-suppl3.pdf]

**Supplementary Table S3.** Semiquantitative method for assessing histological grade in invasive breast carcinomas

| Component                                       | Score            |
|-------------------------------------------------|------------------|
| Tubule formation                                |                  |
| Majority of tumor: >75%                         | 1                |
| Moderate degree: 10%–75%                        | 2                |
| Little or none: <10%                            | 3                |
| Nuclear pleomorphism                            |                  |
| Small, regular, uniform cells                   | 1                |
| Moderate increase in size and variability, etc. | 2                |
| Marked variation in size and shape, etc.        | 3                |
| Mitotic count                                   |                  |
| Dependent on microscope field area              | 1–3              |
| Total sum of scores in each component           | Histologic grade |
| 3–5                                             | Grade 1          |
| 6 or 7                                          | Grade 2          |
| 8 or 9                                          | Grade 3          |
