# Supplementary material for: Standardized pathology report for breast cancer
Source: PubMed Central journal article supplement — J Pathol Transl Med. 2021 Jan 11;55(1):1–15. doi: 10.4132/jptm.2020.11.20 (PMC7829577; doi:10.4132/jptm.2020.11.20), 2021-01-11
Supplement: jptm-2020-11-20-suppl5.pdf [file jptm-2020-11-20-suppl5.pdf]

**Supplementary Table S5.** Pathological classification of primary tumor (pT) category [2]

| pT category | Criteria                                                                                                                                                                  |
|-------------|---------------------------------------------------------------------------------------------------------------------------------------------------------------------------|
| pT1         | Tumor $\leq 20$ mm in greatest dimension                                                                                                                                  |
| pT1mi       | Tumor $\leq 1$ mm in greatest dimension                                                                                                                                   |
| pT1a        | Tumor $> 1$ mm but $\leq 5$ mm in greatest dimension<br>(round any measurement $> 1.0$ – $1.9$ mm to 2 mm)                                                                |
| pT1b        | Tumor $> 5$ mm but $\leq 10$ mm in greatest dimension                                                                                                                     |
| pT1c        | Tumor $> 10$ mm but $\leq 20$ mm in greatest dimension                                                                                                                    |
| pT2         | Tumor $> 20$ mm but $\leq 50$ mm in greatest dimension                                                                                                                    |
| pT3         | Tumor $> 50$ mm in greatest dimension                                                                                                                                     |
| pT4         | Tumor of any size with direct extension to the chest wall and/or to the skin                                                                                              |
| pT4a        | Extension to the chest wall; invasion or adherence to pectoralis muscle in the absence of invasion of chest wall structures does not qualify as pT4                       |
| pT4b        | Ulceration and/or ipsilateral macroscopic satellite nodules and/or edema (including peau d'orange) of the skin that does not meet the criteria for inflammatory carcinoma |
| pT4c        | Both T4a and T4b are present                                                                                                                                              |
| pT4d        | Inflammatory carcinoma (erythema and edema involving $\geq$ one-third of the skin of the breast)                                                                          |
