# Supplementary material for: Standardized pathology report for breast cancer
Source: PubMed Central journal article supplement — J Pathol Transl Med. 2021 Jan 11;55(1):1–15. doi: 10.4132/jptm.2020.11.20 (PMC7829577; doi:10.4132/jptm.2020.11.20), 2021-01-11
Supplement: jptm-2020-11-20-suppl6.pdf [file jptm-2020-11-20-suppl6.pdf]

**Supplementary Table S6.** Pathological classification of regional lymph nodes (pN) category [2]

| pN category | Criteria                                                                                                                                                          |
|-------------|-------------------------------------------------------------------------------------------------------------------------------------------------------------------|
| pNX         | Regional lymph nodes cannot be assessed                                                                                                                           |
| pN0         | No regional lymph node metastasis identified or ITCs only                                                                                                         |
| pN0(i+)     | ITCs only (malignant cell clusters no larger than 0.2 mm) in regional lymph node(s)                                                                               |
| pN1mi       | Micrometastases (approximately 200 cells, larger than 0.2 mm, but none larger than 2.0 mm)                                                                        |
| pN1a        | Metastases in 1 to 3 axillary lymph nodes, at least 1 metastasis larger than 2.0 mm                                                                               |
| pN1b        | Metastases in ipsilateral internal mammary sentinel nodes, excluding ITCs                                                                                         |
| pN1c        | pN1a and pN1b combined                                                                                                                                            |
| pN2a        | Metastases in 4 to 9 axillary lymph nodes (at least 1 tumor deposit larger than 2.0 mm)                                                                           |
| pN2b        | Metastases in clinically detected internal mammary lymph nodes with or without microscopic confirmation; with pathologically negative axillary nodes              |
| pN3a        | Metastases in 10 or more axillary lymph nodes (at least 1 tumor deposit larger than 2.0 mm) or metastases to the infraclavicular (Level III axillary lymph) nodes |
| pN3b        | pN1a or pN2a in the presence of cN2b (positive internal mammary nodes by imaging); or pN2a in the presence of pN1b                                                |
| pN3c        | Metastases in ipsilateral supraclavicular lymph nodes                                                                                                             |

ITC, isolated tumor cell.
