# Supplementary material for: Standardized pathology report for breast cancer
Source: PubMed Central journal article supplement — J Pathol Transl Med. 2021 Jan 11;55(1):1–15. doi: 10.4132/jptm.2020.11.20 (PMC7829577; doi:10.4132/jptm.2020.11.20), 2021-01-11
Supplement: jptm-2020-11-20-suppl8.pdf [file jptm-2020-11-20-suppl8.pdf]

**Supplementary Table S8.** HER2 status by dual-probe in situ hybridization based on the 2018 ASCO/CAP guidelines [3]

| HER2 ISH status | Definition                                                                                                                                                                                                                                                                                                                                                                                                                                                                                                                                                                                                                                                        |
|-----------------|-------------------------------------------------------------------------------------------------------------------------------------------------------------------------------------------------------------------------------------------------------------------------------------------------------------------------------------------------------------------------------------------------------------------------------------------------------------------------------------------------------------------------------------------------------------------------------------------------------------------------------------------------------------------|
| ISH positive    | <p><i>HER2</i>/<i>CEP17</i> ratio <math>\geq 2.0</math> and average <i>HER2</i> copy number <math>\geq 4.0</math> (ISH group 1)</p> <p><i>HER2</i>/<i>CEP17</i> ratio <math>\geq 2.0</math> and average <i>HER2</i> copy number <math>&lt; 4.0</math> (ISH group 2) with concurrent IHC 3+</p> <p><i>HER2</i>/<i>CEP17</i> ratio <math>&lt; 2.0</math> and average <i>HER2</i> copy number <math>\geq 6.0</math> (ISH group 3) with concurrent IHC 2<sup>+a</sup> or 3+</p> <p><i>HER2</i>/<i>CEP17</i> ratio <math>&lt; 2.0</math> with average <i>HER2</i> copy number <math>\geq 4.0</math> and <math>&lt; 6.0</math> (ISH group 4) with concurrent IHC 3+</p> |
| ISH negative    | <p><i>HER2</i>/<i>CEP17</i> ratio <math>&lt; 2.0</math> with average <i>HER2</i> copy number <math>&lt; 4.0</math> (ISH group 5)</p> <p><i>HER2</i>/<i>CEP17</i> ratio <math>\geq 2.0</math> and average <i>HER2</i> copy number <math>&lt; 4.0</math> (ISH group 2) with concurrent IHC 2<sup>+b</sup></p> <p><i>HER2</i>/<i>CEP17</i> ratio <math>&lt; 2.0</math> with average <i>HER2</i> copy number <math>\geq 4.0</math> and <math>&lt; 6.0</math> (ISH group 4) with concurrent IHC 2<sup>+b</sup></p> <p>ISH group 2, 3 and 4 with concurrent IHC 0 or 1+</p>                                                                                             |

*HER2*, human epidermal growth factor receptor type 2; ASCO, American Society of Clinical Oncology; CAP, College of American Pathologists; ISH, in situ hybridization; *CEP17*, centromere on chromosome 17; IHC, immunohistochemistry.

<sup>a</sup>An additional observer blinded to previous result recounts ISH. If the repeated ISH result is categorized to the same group, it is finally regarded as HER2 positive; <sup>b</sup>An additional observer blinded to previous result recounts ISH. If the repeated ISH result is designated to same ISH group, it is finally regarded as HER2 negative.

## References

1. WHO Classification of Tumours Editorial Board. WHO classification of tumours: breast tumours. 5th ed. Lyon: International Agency for Research on Cancer, 2019.
2. Hortobagyi GN, Connolly JL, D'Orsi CJ, et al. Breast. In: Amin MB, Edge S, Greene F, et al., eds. AJCC cancer staging manual. 8th ed. New York: Springer, 2017; 589-636.
3. Wolff AC, Hammond MEH, Allison KH, et al. Human epidermal growth factor receptor 2 testing in breast cancer: American Society of Clinical Oncology/College of American Pathologists clinical practice guideline focused update. J Clin Oncol 2018; 36: 2105-22.
